# Supplementary material
Source: MDPI journal article supplement (https://www.mdpi.com/2076-3417/9/3/564)
Supplement: s1 [file s1]

## Supporting Information

Article

# Dual-Functional Nanoscale Devices Using Phase-Change Materials: A Reconfigurable Perfect Absorber with Nonvolatile Resistance-Change Memory Characteristics

Niloufar Raeis-Hosseini <sup>1,2</sup> and Junsuk Rho <sup>1,3,4,\*</sup>

<sup>1</sup> Department of Chemical Engineering, Pohang University of Science and Technology (POSTECH), Pohang 37673, Korea; niloufar@postech.ac.kr

<sup>2</sup> Current address: Department of Electrical and Electronic Engineering, Imperial College London, London, SW7 2AZ, United Kingdom

<sup>3</sup> Department of Mechanical Engineering, Pohang University of Science and Technology (POSTECH), Pohang 37673, Korea

<sup>4</sup> National Institute of Nanomaterials Technology (NINT), Pohang 37673, Korea

\* Correspondence: [jsrho@postech.ac.kr](mailto:jsrho@postech.ac.kr)

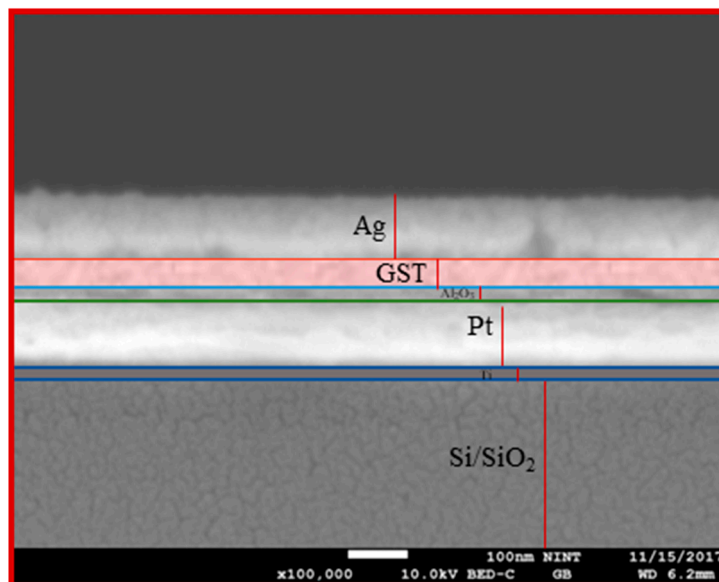

Supporting Figure S1. A SEM cross section of the fabricated device illustrates the successfully fabricated MPA.

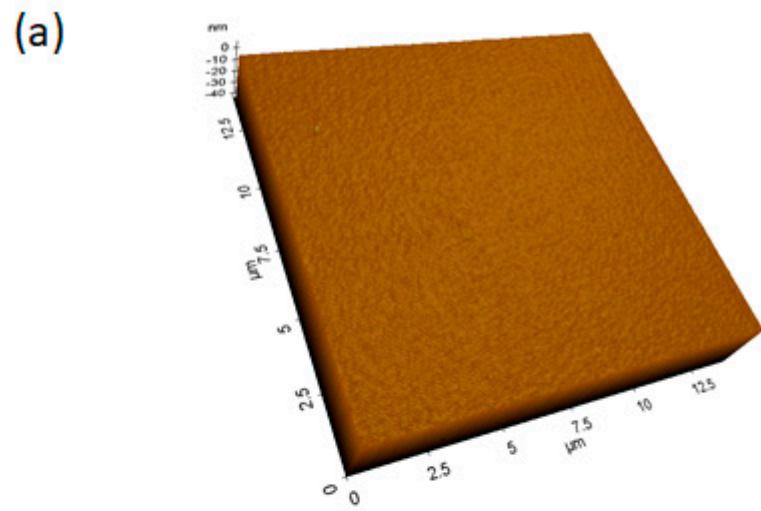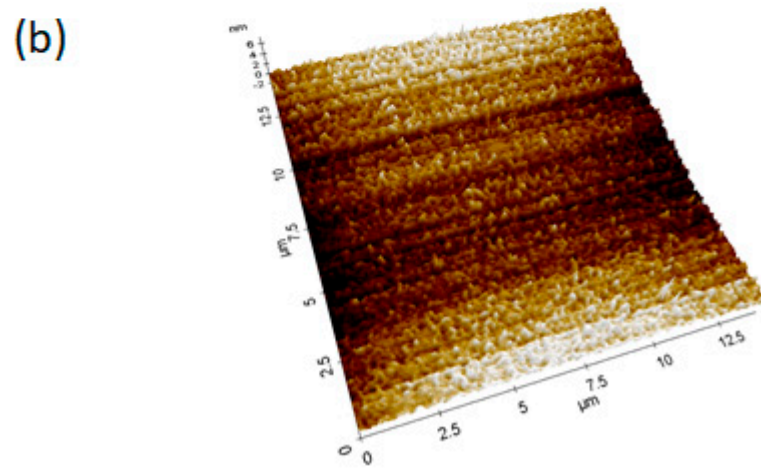

Supporting Figure S2. (a) A surface morphology of the GST thin film at (a) amorphous and (b) crystalline state.
